# Supplementary material for: What do community football players think about different exercise-training programmes? Implications for the delivery of lower limb injury prevention programmes
Source: PubMed Central journal article supplement — Br J Sports Med. 2013 Sep 18;48(8):702–7. doi: 10.1136/bjsports-2013-092816 (PMC3995235; doi:10.1136/bjsports-2013-092816), 2013-09-18
Supplement: bjsports-2013-092816-s1.pdf [file bjsports-2013-092816-s1.pdf]

# Training Program #2

## Exercise Instruction Manual

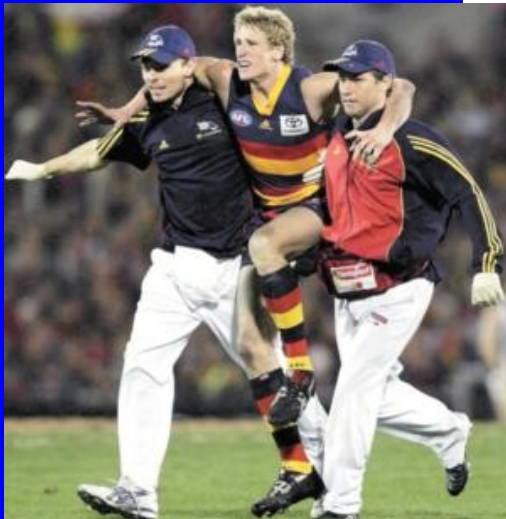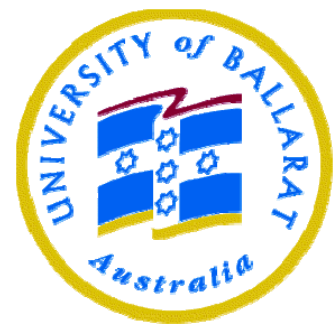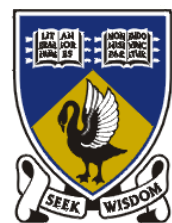

THE UNIVERSITY OF  
WESTERN AUSTRALIA

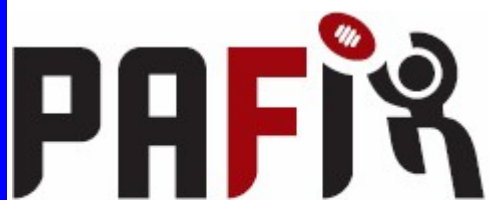

PREVENTING AUSTRALIAN FOOTBALL  
INJURIES THROUGH EXERCISE

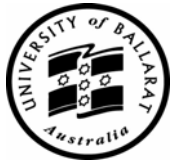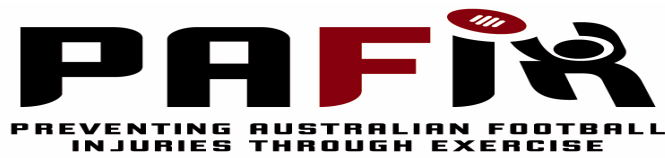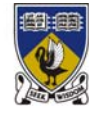

THE UNIVERSITY OF  
WESTERN AUSTRALIA

This project is funded by the National Health and Medical Council (NHMRC) and proudly supported by Football Victoria and the Western Australian Football Commission.

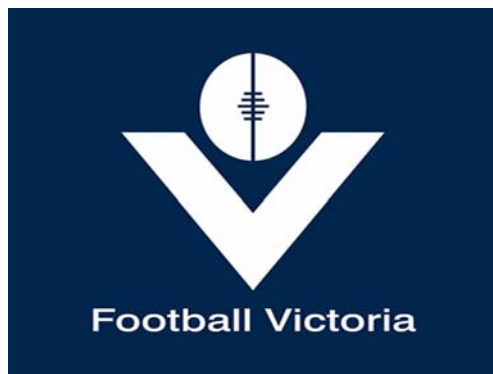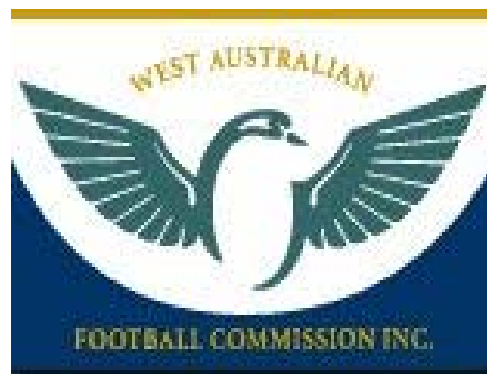

## Table of Contents

---

|                                                  |           |
|--------------------------------------------------|-----------|
| <b>Basic Movement Exercises .....</b>            | <b>5</b>  |
| <i>Squares (10 m)</i> .....                      | 6         |
| Equipment.....                                   | 6         |
| Key point.....                                   | 6         |
| <i>Weaving Bounds (a)</i> .....                  | 7         |
| Equipment.....                                   | 7         |
| Key point.....                                   | 7         |
| <i>Weaving Bounds(b)</i> .....                   | 8         |
| Equipment.....                                   | 8         |
| Key point.....                                   | 8         |
| <i>Shuttle Runs</i> .....                        | 9         |
| Equipment.....                                   | 9         |
| Key point.....                                   | 9         |
| <i>Bunny Jumps</i> .....                         | 10        |
| Equipment.....                                   | 10        |
| Key point.....                                   | 10        |
| <i>Standing Triples</i> .....                    | 11        |
| Equipment.....                                   | 11        |
| Key point.....                                   | 11        |
| <b>General Sprinting Exercises.....</b>          | <b>12</b> |
| <i>Sprints (Lying Start)</i> .....               | 12        |
| Equipment.....                                   | 12        |
| Key point.....                                   | 12        |
| <i>Resisted Sprints (5+15m)</i> .....            | 13        |
| Equipment.....                                   | 13        |
| Key point.....                                   | 13        |
| <i>Tempo Runs</i> .....                          | 14        |
| Equipment.....                                   | 14        |
| Key point.....                                   | 14        |
| <b>Acceleration/Deceleration Exercises .....</b> | <b>15</b> |
| <i>Kneeling Beach Sprints</i> .....              | 15        |
| Equipment.....                                   | 15        |
| Key point.....                                   | 15        |
| <i>Graduated Sprints (20m)</i> .....             | 16        |
| Equipment.....                                   | 16        |
| Key point.....                                   | 16        |
| <i>Stoppies (10+2m)</i> .....                    | 17        |
| Equipment.....                                   | 17        |
| Key point.....                                   | 17        |
| <b>COD/Agility Exercises.....</b>                | <b>18</b> |
| <i>PP COD</i> .....                              | 18        |
| Equipment.....                                   | 18        |
| Key point.....                                   | 18        |
| <i>UP COD (180 Turn)</i> .....                   | 19        |
| Equipment.....                                   | 19        |
| Key point.....                                   | 19        |

|                                      |    |
|--------------------------------------|----|
| <i>PP COD (Double Forward)</i> ..... | 20 |
| Equipment.....                       | 20 |
| Key point .....                      | 20 |
| <i>Backpedals (a) (15m)</i> .....    | 21 |
| Equipment.....                       | 21 |
| Key point .....                      | 21 |
| <i>Backpedals (b) (15m)</i> .....    | 22 |
| Equipment.....                       | 22 |
| Key point .....                      | 22 |
| <i>T-test</i> .....                  | 23 |
| Equipment.....                       | 23 |
| Key point .....                      | 23 |

Abbreviations:

SLS = Single leg stance

DLS = Double leg stance

DL = Double leg

SL = Single leg

EO = Eyes open

EC = Eyes closed

HB = Head back

COD = Change of direction

PP = Pre-planned

UP = Un-planned

Conventions

Jump = Two legged movement

Hop = One legged ipsi-lateral i.e., left leg to left leg

Bound = One legged contra-lateral i.e., left leg to right leg

Asterisks beside exercises indicate these exercise can be run concurrently.

Some programs have 1 or 2 asterisks, in this case only run exercises concurrently with the same number of asterisks.

## Basic Movement Exercises

---

### Squares (10 m)

Players run as indicated in diagram

#### Equipment

- Cones
- Dura discs

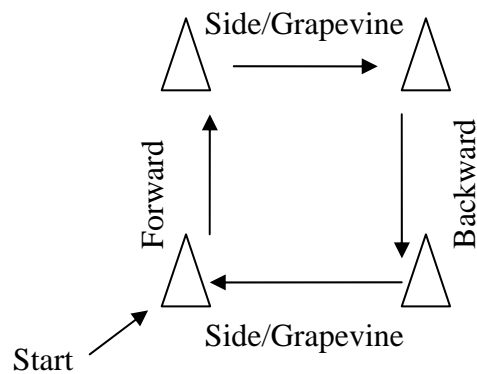

#### Key point

- Smooth transition between running tasks

## **Weaving Bounds (a)**

Cones are placed 1 m apart in the direction of movement

Channel through which players bound is about 2 m wide

Length of cones is about 10 metres

Players are to bound weaving from cone to cone

Bounding speed is moderate pace

### **Equipment**

- Cones

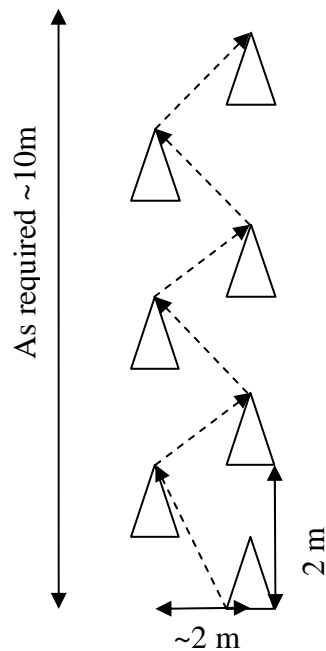

### **Key point**

- Emphasise forward running speed

## ***Weaving Bounds (b)***

Cones are placed 1 m apart in the direction of movement

Length of cones is about 10 metres

Channel through which players bound is larger than previous exercise, > 2 m

Bounding speed is moderate to fast pace

### **Equipment**

- Cones

See previous diagram. Adjust distances as needed.

### **Key point**

- Emphasise forward running speed



## **Shuttle Runs**

Cones are placed in a square outlining a 20 m distance

1 rep is up and back

Players run up and back for required number of reps at moderate-fast pace

### **Equipment**

- Cones

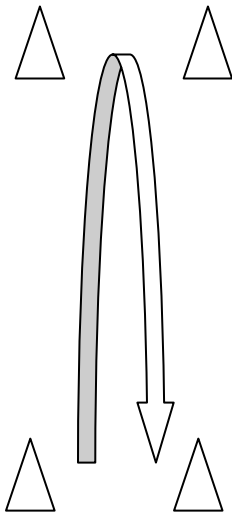

### **Key point**

- Quick turnaround at top

## ***Bunny Jumps***

Using a powerful arm swing to help propel forward players jump forward for required number of jumps

### **Equipment**

- N/A

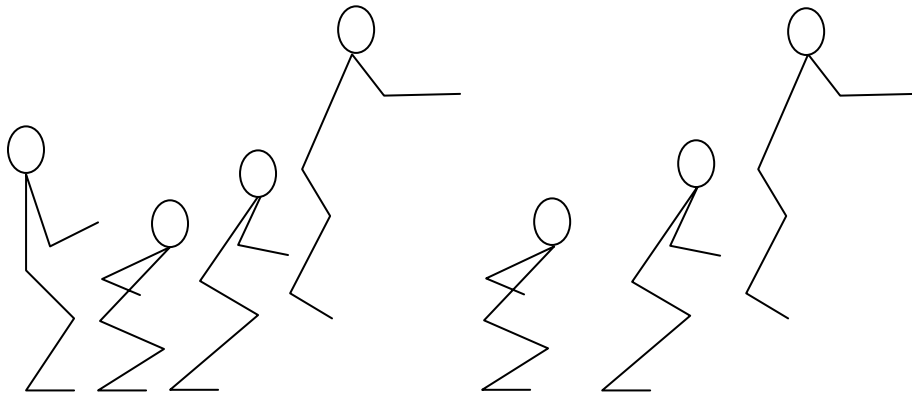

### **Key point**

- Quick transition between jumps

## **Standing Triples**

Players perform a hop, skip, and jump from a standing start

Players should try to jump further with each rep

### **Equipment**

- N/A

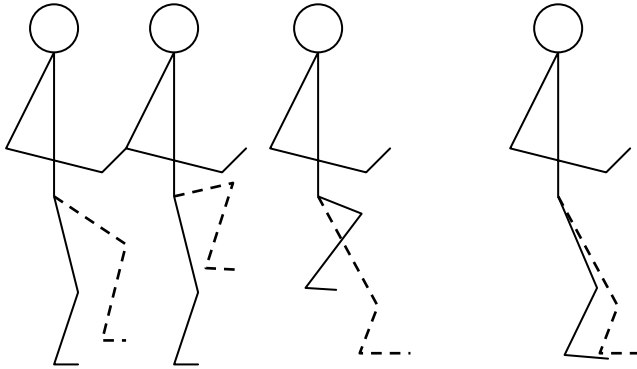

### **Key point**

- Quick transition between each rep

## General Sprinting Exercises

---

### ***Sprints (Lying Start)***

Players start lying on their stomach with feet pointing in direction to run

On command players get up as quick as possible and run over required distance

Walk back to start for recovery

### **Equipment**

- Cones

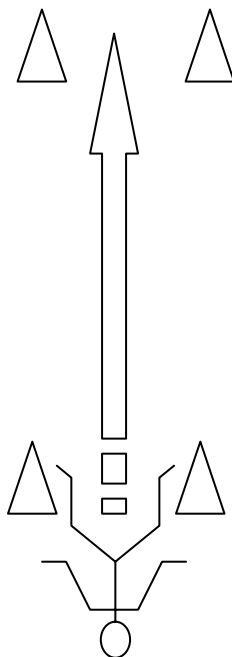

### **Key point**

- Quick transition from lying to standing

## **Resisted Sprints (5+15m)**

Player behind the sprinter grabs their waist

The sprinter is resisted for the first 5 m and is to emphasise leg drive and stride rate

Both are to move forward to the 5 m mark

At the 5 m mark the sprinter is released and sprints maximally for 15 m

Sprinter is to run with ball in hand

### **Equipment**

- Cones
- Footballs

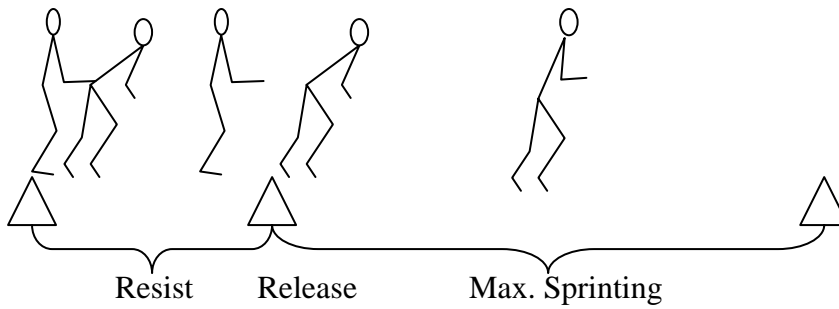

### **Key point**

- Emphasise forward body lean and short, quick strides

## **Tempo Runs**

Exercise is performed over a total distance of 40 m

The first 10 m requires players to perform one of a number of drills

- Ankling
- Walking/Skipping A's
- Stiff leg pull throughs
- Grapevine
- Side-to-side

These drills are to be varied by trainer as required

After the drill players accelerate and sprint the last 30 m as fast as possible

Maintain good sprinting technique

### **Equipment**

- Cones

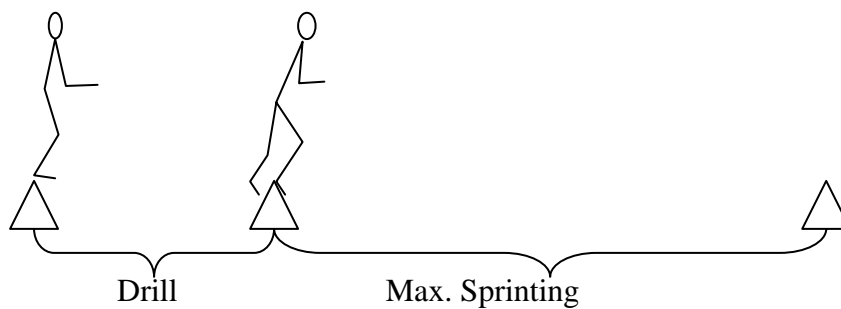

### **Key point**

- Emphasis on the drill at the start

## Acceleration/Deceleration Exercises

---

### ***Kneeling Beach Sprints***

One on knee

Rear foot must be flat

Push off front foot going up and forward

Trailing foot/leg must be strong to support weight on 1st step

Maintain sprinting technique

Handicap players if necessary (i.e., faster ones start behind)

Look for good lean at start

### **Equipment**

- N/A

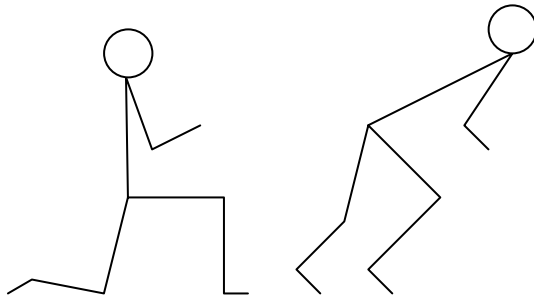

### **Key point**

- Quick transition from one knee to up

## **Graduated Sprints (20m)**

Players run and accelerate at each check point

Emphasise a sudden change in speed at 5, 10, 15 m

At 15 m players should be running maximally

### **Equipment**

- Cones

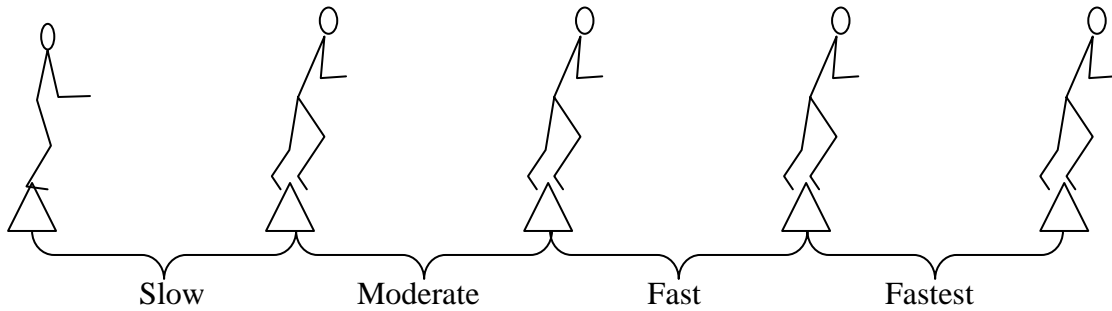

### **Key point**

- Emphasise sudden speed changes at each marker



## Stoppies (10+2m)

Players run as fast as they can for 10 m

They must come to a complete stop within 2 m after the 10 m

### Equipment

- Cones

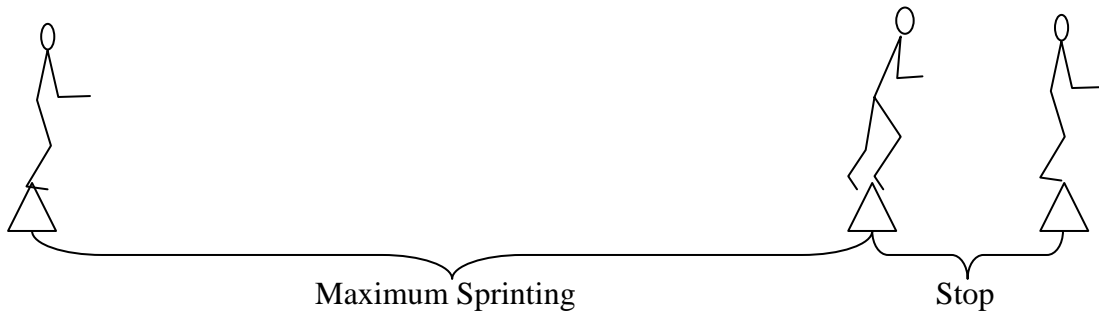

### Key point

- Must stop abruptly in 2 metre

## COD/Agility Exercises

---

### **PP COD**

With prior knowledge of which way to cut players run up the middle and cut left or right

Players are to run with a ball in their hands

### **Equipment**

- Cones
- Footballs

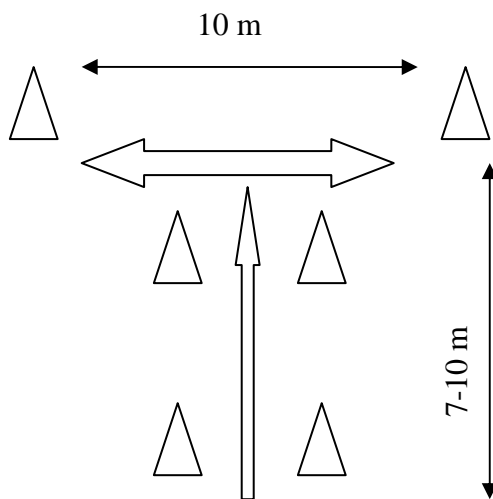

### **Key point**

- Complete task as fast as possible

## **UP COD (180 Turn)**

*Without* prior knowledge of which way to cut players run up the middle and are directed by a stimulus which way to cut

Stimulus is trainer that points to the direction of cut (run with ball in hand)

After making cut players make a 180 turn back to start as quickly as possible

### **Equipment**

- Cones
- Footballs

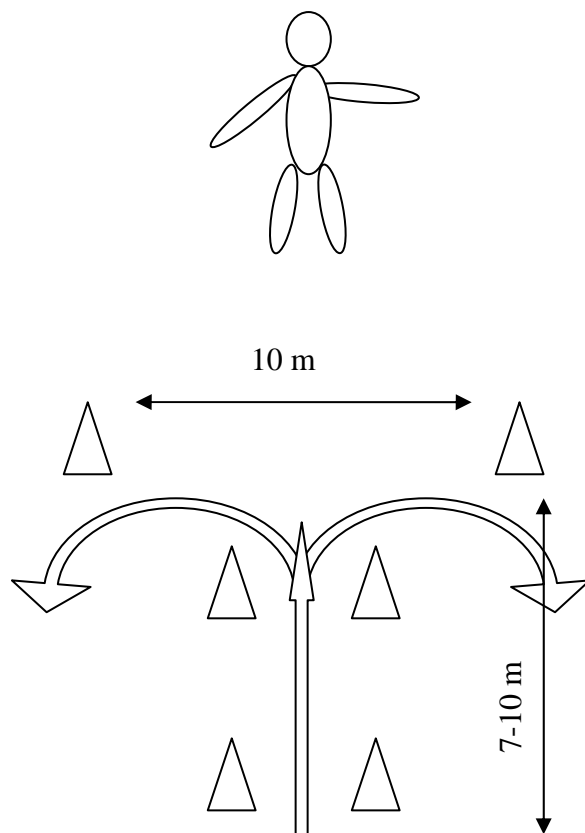

### **Key point**

- Respond as quickly as possible to trainer/player's command

## ***PP COD (Double Forward)***

With prior knowledge of which way to cut players run up the middle and cut left or right, then cut right or left

i.e., if players first cut to the left they follow this with a cut to the right and vice versa

Players are to run with a ball in their hands

### **Equipment**

- Cones
- Footballs

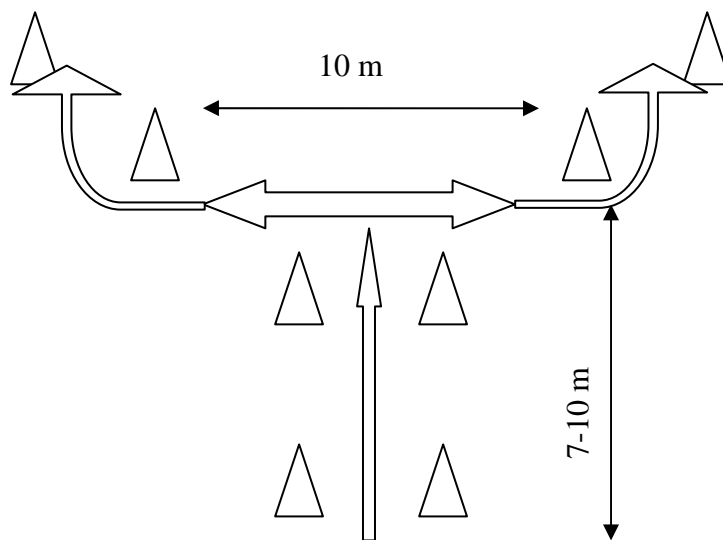

### **Key point**

- Emphasise sharp sudden COD

## **Backpedals (a) (15m)**

Players backpedal (run backwards) for 15m

When they reach the end they sprint forward to the start as fast as possible

### **Equipment**

- Cones

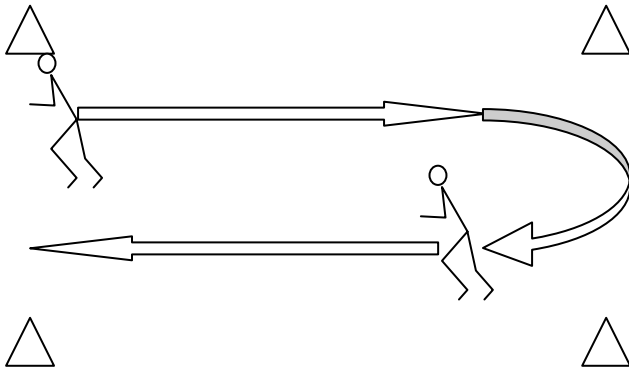

### **Key point**

- Emphasise sharp sudden COD and good forward sprinting technique

## **Backpedals (b) (15m)**

Players backpedal (run backwards) for 15m

When they reach the end they turn 90° and sprint to the side

Vary side to run to as required

### **Equipment**

- Cones

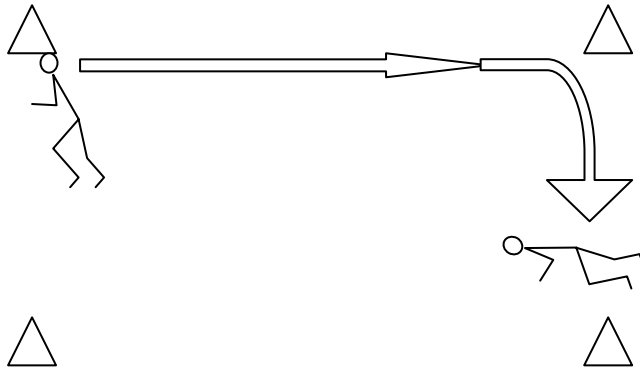

### **Key point**

- Emphasise sharp sudden 90° turn

## T-test

Players run through a standard T-test

Run forward around cone, turn 90 degrees left (or right), run forward, turn 180 degrees around cone, run past the middle cone, turn 180 degrees around the end, back to the middle turn 90 degrees and run back to the start.

## Equipment

- Cones

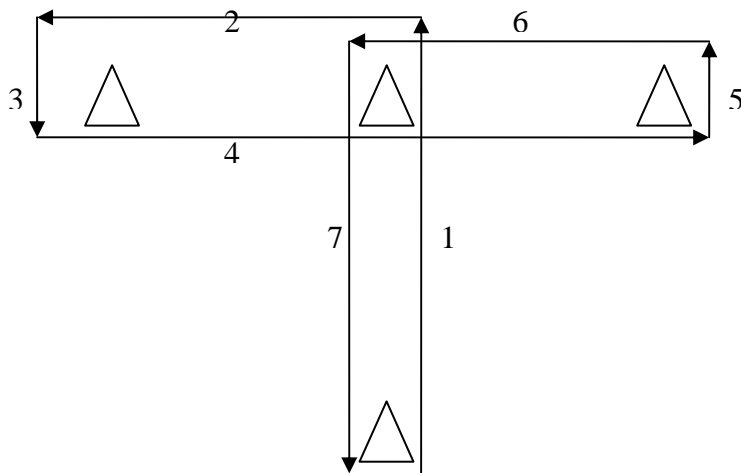

## Key point

- Complete task as quickly as possible
