# Supplementary material for: What do community football players think about different exercise-training programmes? Implications for the delivery of lower limb injury prevention programmes
Source: PubMed Central journal article supplement — Br J Sports Med. 2013 Sep 18;48(8):702–7. doi: 10.1136/bjsports-2013-092816 (PMC3995235; doi:10.1136/bjsports-2013-092816), 2013-09-18
Supplement: bjsports-2013-092816-s2.pdf [file bjsports-2013-092816-s2.pdf]

# Training Program #1

## Exercise Instruction Manual

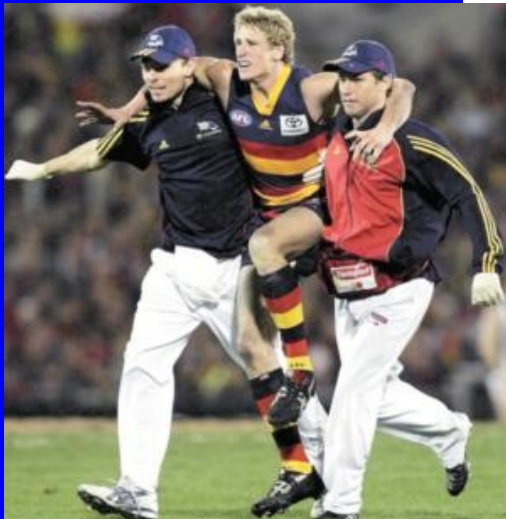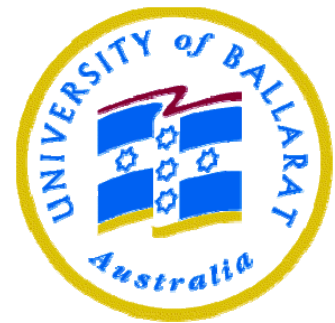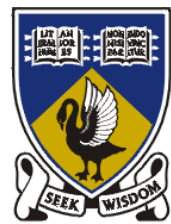

THE UNIVERSITY OF  
WESTERN AUSTRALIA

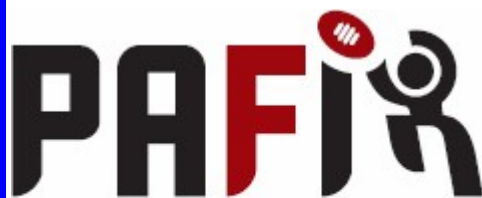

PREVENTING AUSTRALIAN FOOTBALL  
INJURIES THROUGH EXERCISE

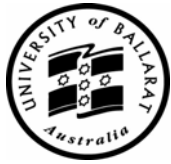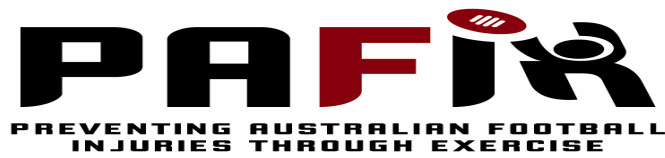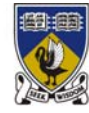

THE UNIVERSITY OF  
WESTERN AUSTRALIA

This project is funded by the National Health and Medical Council (NHMRC) and proudly supported by Football Victoria and the Western Australian Football Commission.

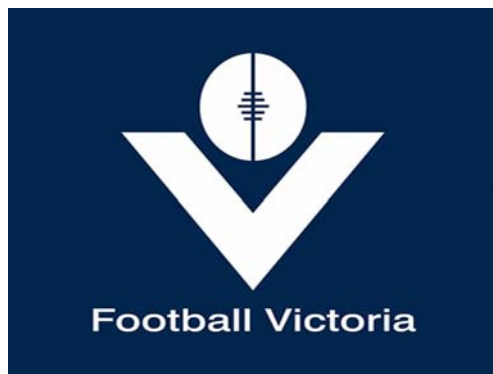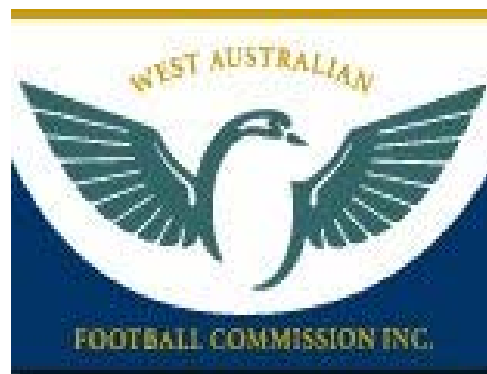

## Table of Contents

---

|                                       |           |
|---------------------------------------|-----------|
| <b>Basic Movement Exercises .....</b> | <b>5</b>  |
| <i>Squares (10 m)</i> .....           | 6         |
| Equipment.....                        | 6         |
| Key points .....                      | 6         |
| <i>Weaving Bounds (a)</i> .....       | 7         |
| Equipment.....                        | 7         |
| Key points .....                      | 7         |
| <i>Weaving Bounds(b)</i> .....        | 8         |
| Equipment.....                        | 8         |
| Key points .....                      | 8         |
| <i>Weaving Hops</i> .....             | 9         |
| Equipment.....                        | 9         |
| Key points .....                      | 9         |
| <b>Balance Exercises .....</b>        | <b>10</b> |
| <i>Dura-Disc Balance</i> .....        | 10        |
| Equipment.....                        | 10        |
| Key points .....                      | 10        |
| <i>Wobble Board Balance</i> .....     | 11        |
| Equipment.....                        | 11        |
| Key points .....                      | 11        |
| <i>Balance Hand Passing</i> .....     | 12        |
| Equipment.....                        | 12        |
| Key points .....                      | 12        |
| <i>Balance Kicking</i> .....          | 13        |
| Equipment.....                        | 13        |
| Key points .....                      | 13        |
| <b>Hopping Exercises .....</b>        | <b>14</b> |
| <i>Dura-Disc Hop</i> .....            | 14        |
| Equipment.....                        | 14        |
| Key points .....                      | 14        |
| <i>Hurdle Jumps</i> .....             | 15        |
| Equipment.....                        | 15        |
| Key points .....                      | 15        |
| <i>Lateral Hurdle Jumps</i> .....     | 16        |
| Equipment.....                        | 16        |
| Key points .....                      | 16        |
| <i>Hurdle Jump (PP Step)</i> .....    | 17        |
| Equipment.....                        | 17        |
| Key points .....                      | 17        |
| <i>Hurdle Jump (UP Step)</i> .....    | 18        |
| Equipment.....                        | 18        |
| Key points .....                      | 18        |
| <i>Hurdle Hop</i> .....               | 19        |
| Equipment.....                        | 19        |
| Key points .....                      | 19        |

|                                            |           |
|--------------------------------------------|-----------|
| <b>Change of Direction Exercises.....</b>  | <b>20</b> |
| <i>PP COD.....</i>                         | 20        |
| Equipment.....                             | 20        |
| Key points .....                           | 20        |
| <i>UP COD .....</i>                        | 21        |
| Equipment.....                             | 21        |
| Key points .....                           | 21        |
| <i>UP COD (180 Turn).....</i>              | 22        |
| Equipment.....                             | 22        |
| Key points .....                           | 22        |
| <b>Swiss Ball Exercises .....</b>          | <b>23</b> |
| <i>SB Kneeling.....</i>                    | 23        |
| Equipment.....                             | 23        |
| Key points .....                           | 23        |
| <i>SB Squat .....</i>                      | 24        |
| Equipment.....                             | 24        |
| Key points .....                           | 24        |
| <b>Mini-tramp Exercises .....</b>          | <b>25</b> |
| <i>Mini-Tramp Land .....</i>               | 25        |
| Equipment.....                             | 25        |
| Key points .....                           | 25        |
| <i>Mini-Tramp Land (Lateral Hop) .....</i> | 26        |
| Equipment.....                             | 26        |
| Key points .....                           | 26        |
| <i>Mini-Tramp Land (Hop, Step).....</i>    | 27        |
| Equipment.....                             | 27        |
| Key points .....                           | 27        |
| <i>Mini-Tramp Land (Catch, Step).....</i>  | 28        |
| Equipment.....                             | 28        |
| Key points .....                           | 28        |
| <b>Training Exercises Rollout .....</b>    | <b>29</b> |

Abbreviations:

SLS = Single leg stance

DLS = Double leg stance

DL = Double leg

SL = Single leg

EO = Eyes open

EC = Eyes closed

HB = Head back

COD = Change of direction

PP = Pre-planned

UP = Un-planned

Conventions

Jump = Two legged movement

Hop = One legged ipsi-lateral i.e., left leg to left leg

Bound = One legged contra-lateral i.e., left leg to right leg

Asterisks beside exercises indicate these exercise can be run concurrently.

Some programs have 1 or 2 asterisks, in this case only run exercises concurrently with the same number of asterisks.

## Basic Movement Exercises

---

### Squares (10 m)

Players run as indicated in diagram

After completing the running component they complete a balance task that can be modified to match skill as necessary

i.e., DLS (HB) 20 sec

#### Equipment

- Cones
- Dura discs

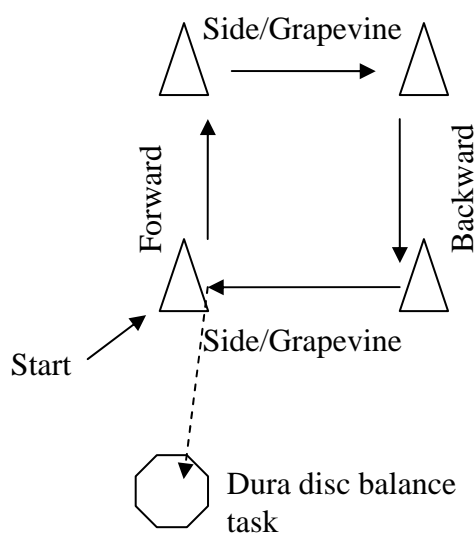

#### Key points

- Smooth transition between running tasks
- Maintain balance on balance task

## **Weaving Bounds (a)**

Cones are placed 1 m apart in the direction of movement

Length of cones is about 10 metres

Channel through which players bound is about 2 m wide

Players are to bound weaving from cone to cone

Bounding speed is moderate pace

### **Equipment**

- Cones

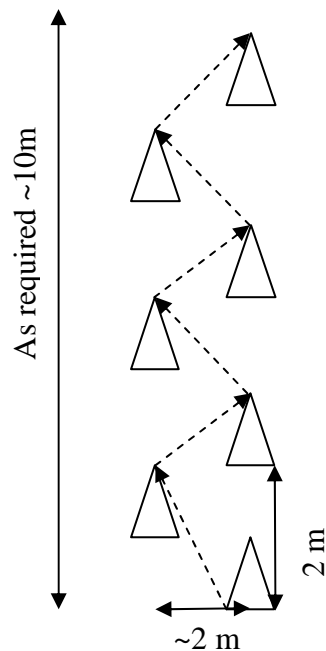

### **Key points**

- Smooth transition between bounds
- Maintain stable upper body i.e., no leaning

## **Weaving Bounds (b)**

Cones are placed 1 m apart in the direction of movement

Length of cones is about 10 metres

Channel through which players bound is larger than previous exercise, > 2 m

Players are to bound weaving aggressively from cone to cone

Bounding speed is moderate to fast pace

Players are provided with instruction as to how best to weave

i.e., body upright, no twisting, keeping foot close to mid-line

### **Equipment**

- Cones

See previous diagram. Adjust distances as needed.

### **Key points**

- Sharp/hard bounds from cone to cone
- Smooth transition between bounds
- Maintain stable upper body i.e., no leaning



## ***Weaving Hops***

Cones are placed < 1 m apart in the direction of movement

Length of cones is 10 metres

Channel through which players run is narrower than previous exercise, ~ 1 m

Players are to hop on same leg from cone to cone

Players are provided with instruction as to how best to weave

i.e., body upright, no twisting, keeping foot close to mid-line

### **Equipment**

- Cones

See previous diagram. Adjust distances as needed.

### **Key points**

- Smooth transition between hops
- Maintain stable upper body i.e., no leaning
- Maintain lower leg stability i.e., no wavering of knee

## Balance Exercises

---

### ***Dura-Disc Balance***

Players are to maintain balance on dura disc for specified amount of time.

Variations to this exercise include

DLS/SLS

EO/EC

HB

### **Equipment**

- Dura disc

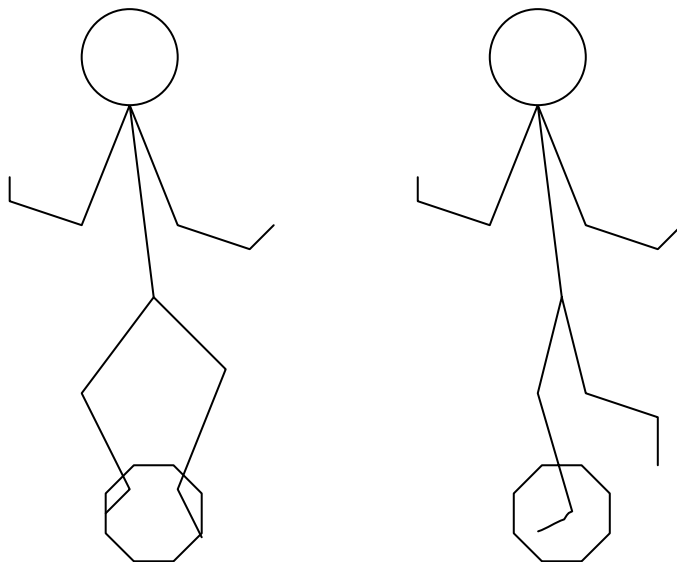

### **Key points**

- Must concentrate to complete required time
- Maintain balance with as little movement of arms/legs as possible

## **Wobble Board Balance**

Players to maintain balance on a wobble board for specified amount of time.

Variations to this exercise include

Double leg stance (DLS)

Single leg stance (SLS)

Eyes Open (EO)

Eyes Closed (EC)

Head back (HB)

### **Equipment**

- Wobble board

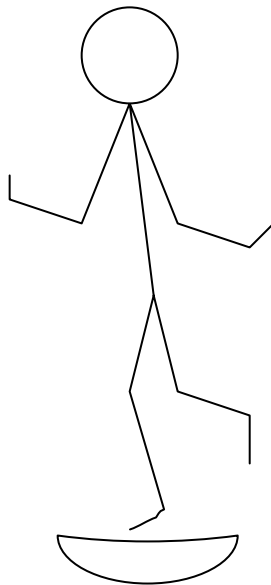

### **Progressions**

Tasks can be made more difficult by including movements of arms, legs, etc. as players improve. For hand passing drills target outside of body, and touch further away. Increase speed of movements.

### **Key points**

- Must concentrate to complete required time
- Maintain balance with as little movement of arms/legs as possible

## **Balance Hand Passing**

Conducted in pairs, players hand pass to each other over a distance of 10 meters for a specified amount of time

Variations of this drill include  
touching the ball to the ground in between passes  
standing on a wobble board/dura disc  
SLS/DLS

### **Equipment**

- Footballs
- Wobble board

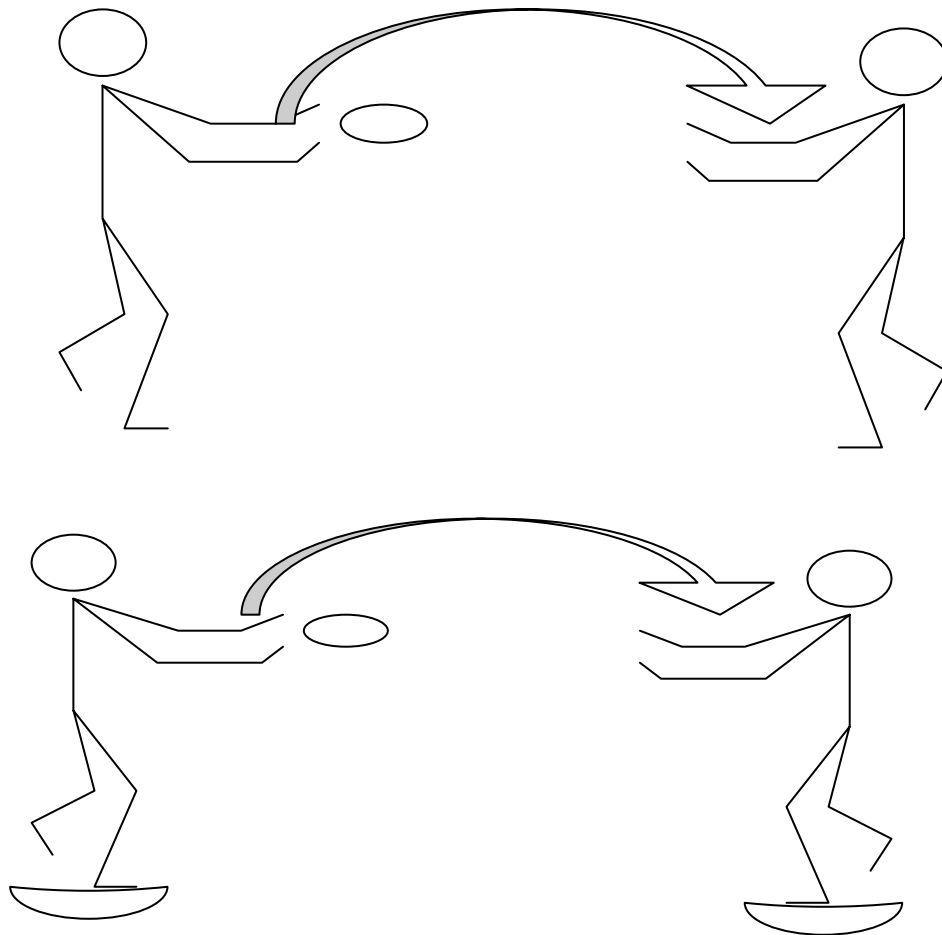

### **Key points**

- Focus on maintaining balance and not pass
- Must maintain balance with as little extraneous movement of arms/legs as possible

## ***Balance Kicking***

Conducted in pairs, players kick to each other over a distance of 10 meters for a specified amount of time

Usually conducted as SLS but can vary with DLS as skill dictates

### **Equipment**

- Footballs
- Dura disc

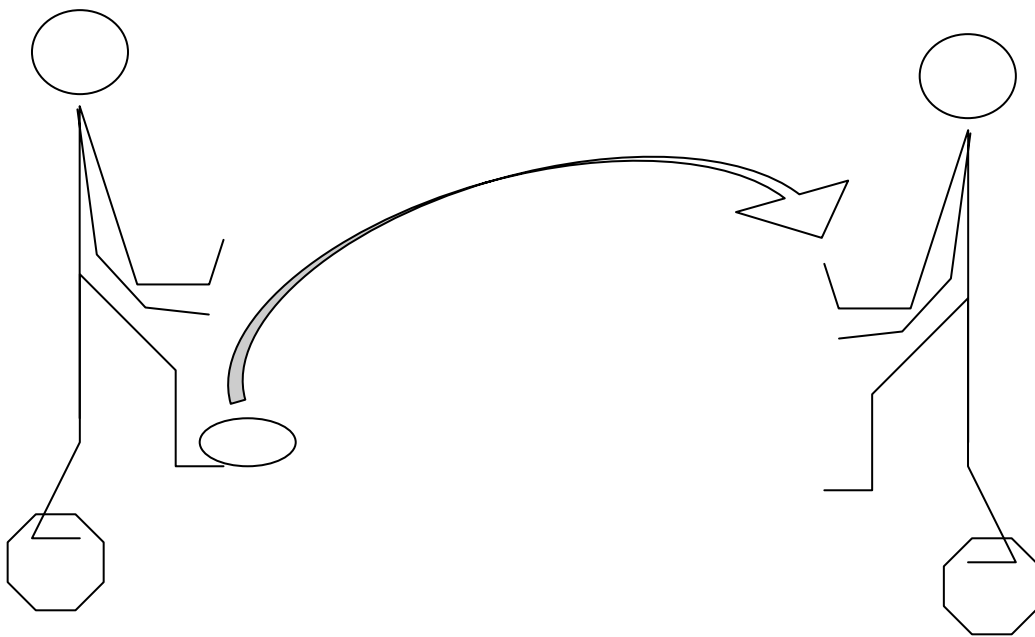

### **Key points**

- Focus on maintaining balance and not kick
- Must maintain balance with as little extraneous movement of arms/legs as possible

## Hopping Exercises

---

### *Dura-Disc Hop*

Hop onto dura disc hold SLS balance for period of time

Can vary balance after hop as per usual Dura Disc Balance

Time to hold balance on dura disc may be specified

### Equipment

- Dura disc

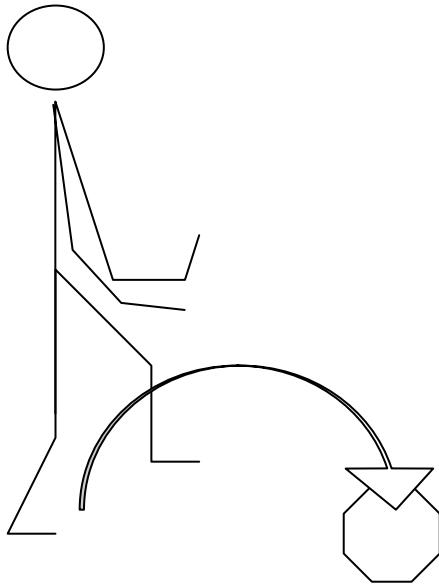

### Key points

- Must maintain balance after hop
- Keep extraneous arm and leg movement to a minimum

## **Hurdle Jumps**

Continuous jumping over hurdles

### **Equipment**

- Hurdles

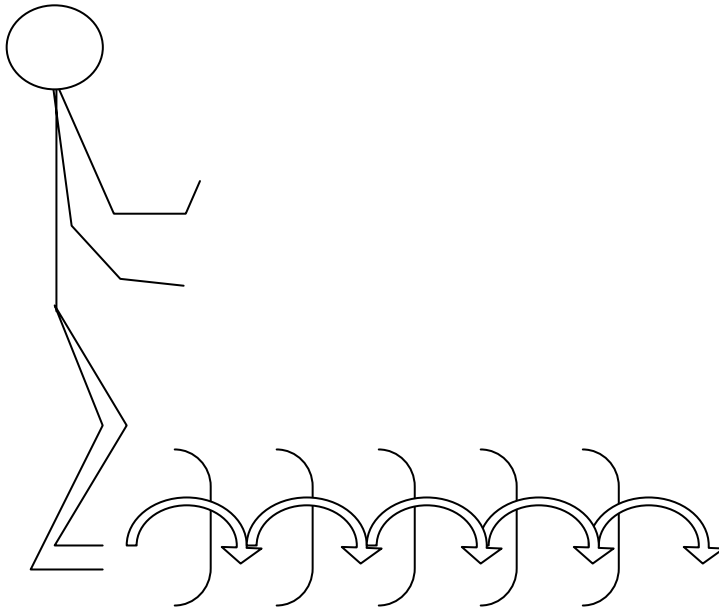

### **Key points**

- Smooth transition between jumps
- Flex knees to absorb landing
- Maintain lower leg stability i.e., no wavering of knee

## ***Lateral Hurdle Jumps***

Players jump forward/backward over hurdles then side/side (left) and side/side (right)

Instruction is provided regarding technique as usual

### **Equipment**

- Hurdles

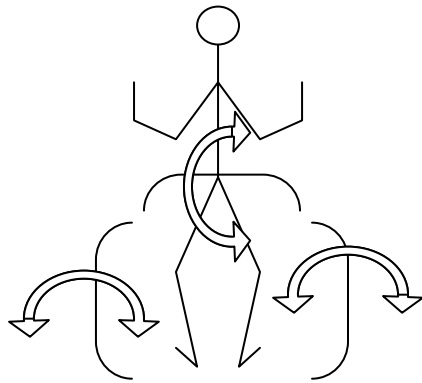

### **Key points**

- Flex knees to absorb landing
- Keep extraneous arm and upper body movement to a minimum
- Maintain lower leg stability i.e., no wavering of knee



## ***Hurdle Jump (PP Step)***

Players jump forward over hurdle then immediately perform a step to left or right

Knowledge about step direction is given prior to task

Instruction is provided regarding technique as usual

Player can run with ball in hand

### **Equipment**

- Hurdles
- Football

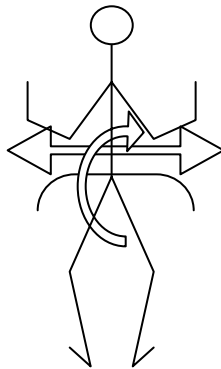

### **Key points**

- Flex knees to absorb landing
- Keep foot close to hips

## **Hurdle Jump (UP Step)**

Players jump forward over hurdle then immediately perform a step to left or right

Knowledge about step direction is *not given* prior to task

Stimulus is handball to side or,

Stimulus is trainer/player pointing

Instruction is provided regarding technique as usual

### **Equipment**

- Hurdles
- Football

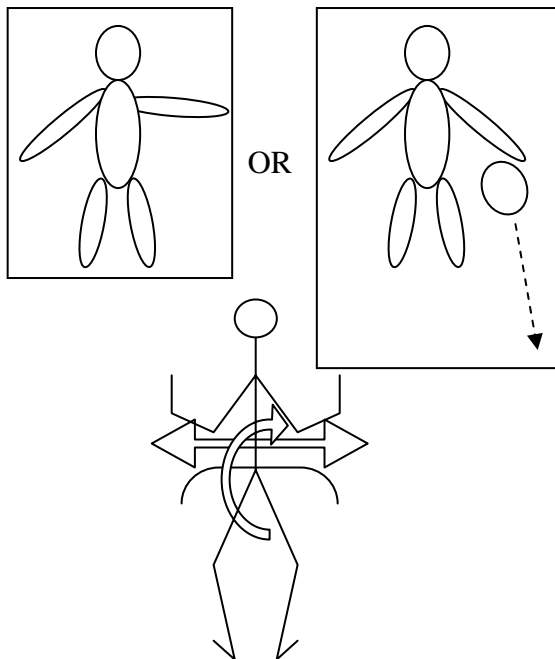

### **Key points**

- Smooth transition from hop to step
- Avoid excessive upper body movement
- Keep foot close to hips

## **Hurdle Hop**

On a single leg players hop continuously forward over hurdles

Number of hurdles is pre-determined (about 5)

Players alternate legs with each set

### **Equipment**

- Hurdles

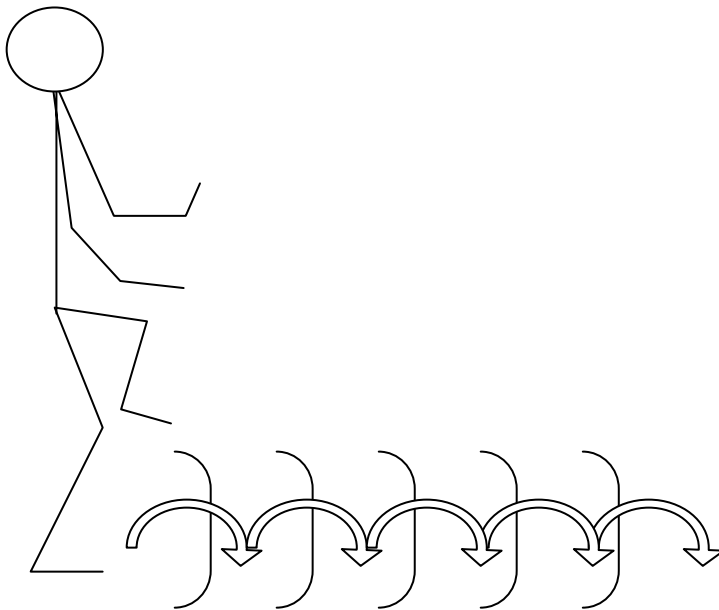

### **Key points**

- Avoid excessive upper body movement
- Maintain lower leg stability i.e., no wavering of knee
- Flex knees to absorb landing

## Change of Direction Exercises

---

### **PP COD**

With prior knowledge of which way to cut players run up the middle and cut left or right

Players are provided with instruction with respect to their COD technique

Players are to run with a ball in their hands

### **Equipment**

- Cones
- Footballs

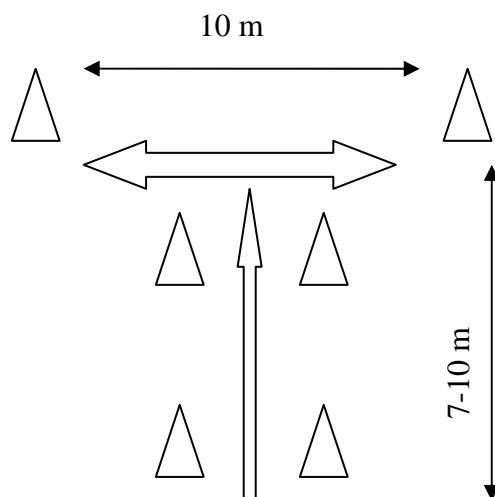

### **Key points**

- Avoid excessive upper body movement i.e., no leaning
- Keep arms close to body
- Keep foot close to hips

## UP COD

Without prior knowledge of which way to cut players run up the middle and are directed by a stimulus which way to cut

Stimulus is handball to side or,

Stimulus is trainer/player pointing (run with ball in hand)

Players are provided with instruction with respect to their COD technique

The task can be made more difficult by placing hurdles at start of task

### Equipment

- Cones
- Footballs
- Hurdles

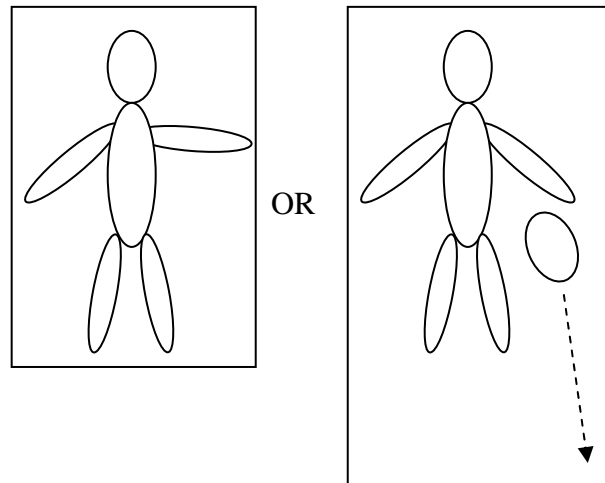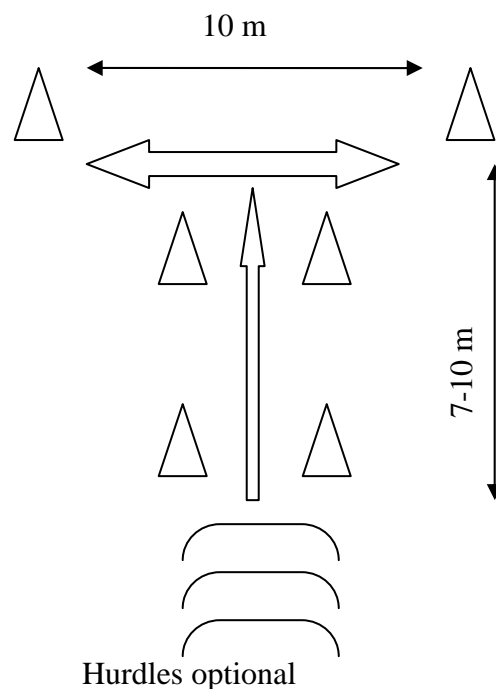

### Key points

- Avoid excessive upper body movement i.e., no leaning
- Keep arms close to body
- Keep foot close to hips

## **UP COD (180 Turn)**

*Without* prior knowledge of which way to cut players run up the middle and are directed by a stimulus which way to cut

Stimulus is defensive player that must be avoided (run with ball in hand)

After making cut players make a 180 turn back to start as quickly as possible

Players are provided with instruction with respect to their COD technique

### **Equipment**

- Cones
- Footballs

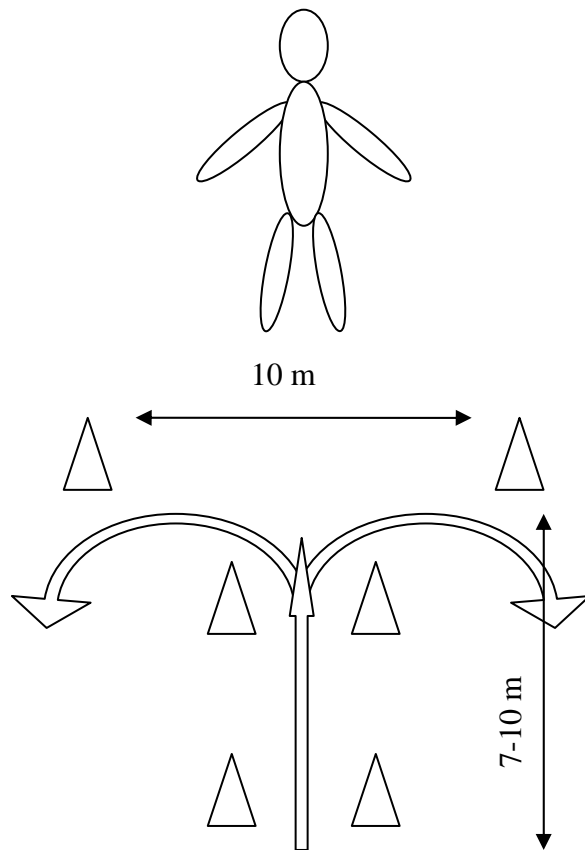

### **Key points**

- Avoid excessive upper body movement i.e., no leaning
- Keep arms close to body
- Bend knees for turning

## Swiss Ball Exercises

---

### ***SB Kneeling***

Using a base for the Swiss ball players are to balance on ball for specified period of time

Variations include

No base, but partner to assist when needed

### **Equipment**

- Swiss ball
- Support base

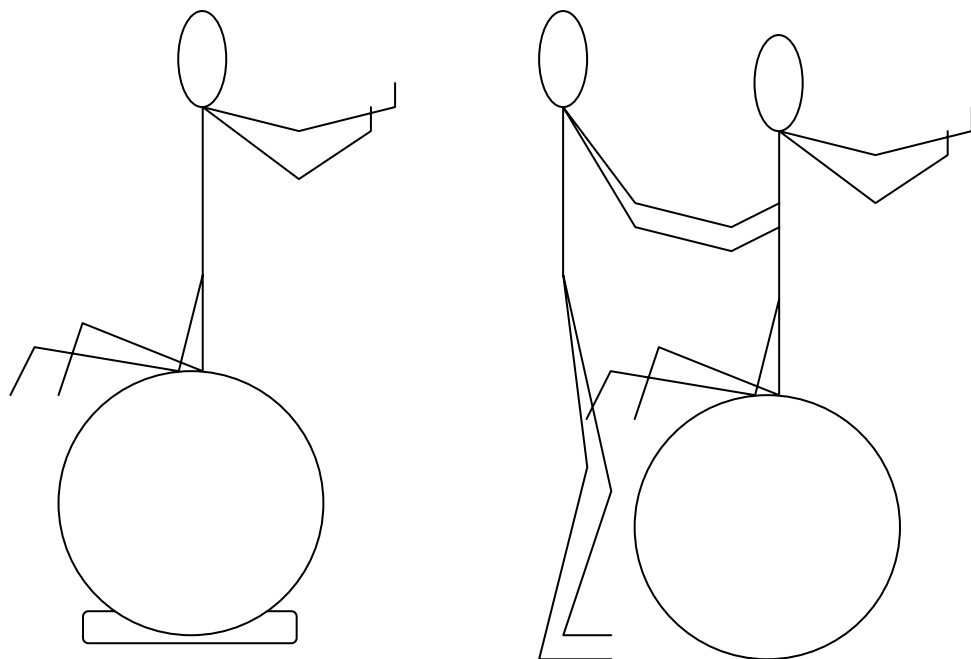

### **Key points**

- Concentrate to complete task
- Avoid excessive arm movement
- Avoid excessive trunk movement

## **SB Squat**

Players are to balance in a semi-squat on ball for specified period of time

A partner can assist when needed

### **Equipment**

- Swiss ball

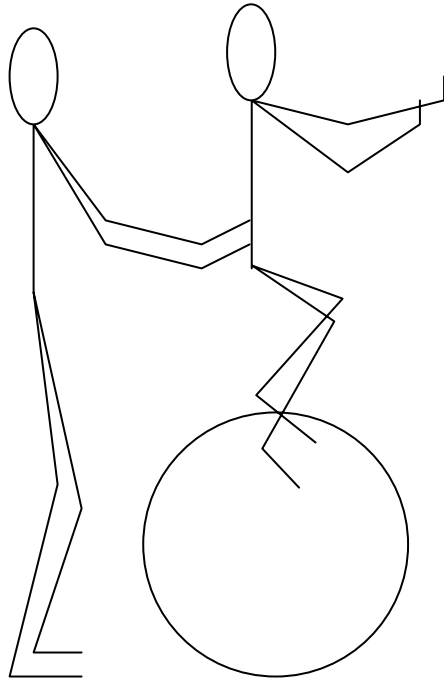

### **Key points**

- Concentrate to complete task
- Avoid excessive arm movement
- Avoid excessive trunk movement



## Mini-tramp Exercises

---

### ***Mini-Tramp Land***

Players are to jump or hop onto the min-tramp and land with good technique

Instruction is provided regarding technique as usual

Can be performed as a DL or SL drill

### **Equipment**

- Mini-tramp
- Footballs

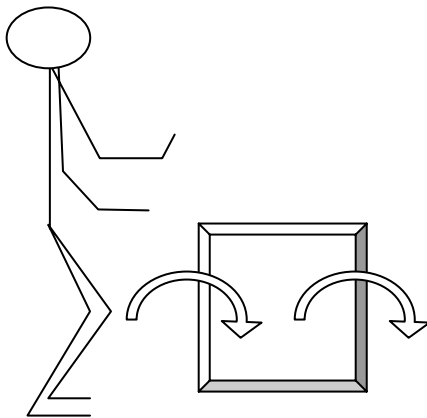

### **Progressions**

Tasks can be made more difficult by including movements of arms, legs, etc. as players improve. For hand passing drills target outside of body, and touch further away. Increase speed of movements. DL movements *may* progress to SL. Mini-tramp can increase lateral distance of jump.

### **Key points**

- Bend knees to absorb landing
- Avoid excessive trunk movement
- Keep arms close to body

## **Mini-Tramp Land (Lateral Hop)**

Players are to jump or hop onto the min-tramp and land

Immediately after landing they are to laterally hop to left or right as per *prior* instruction

Drill is conducted with ball in hand

Instruction is provided regarding technique as usual

### **Equipment**

- Mini-tramp
- Footballs
- Hurdles

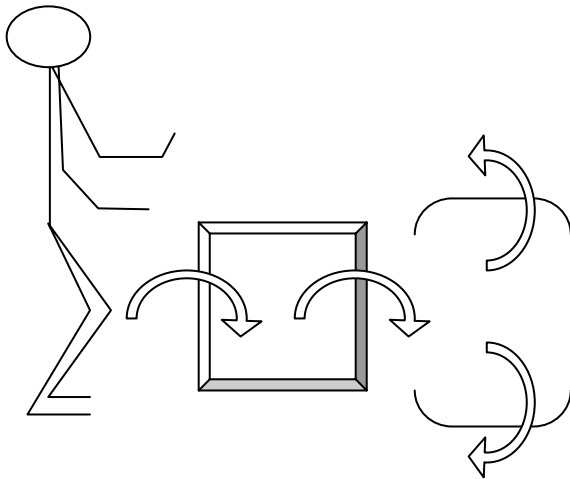

### **Key points**

- Bend knees to absorb landing
- Don't lean upper body
- Stop excessive forward motion

## **Mini-Tramp Land (Hop, Step)**

Players are to jump onto the min-tramp and land

Immediately after landing they are to hop forward and then step left or right as per stimulus

Stimulus is handball to side or,

Stimulus is trainer/player pointing (run with ball in hand)

Instruction is provided regarding technique as usual

### **Equipment**

- Mini-tramp
- Footballs
- Hurdles

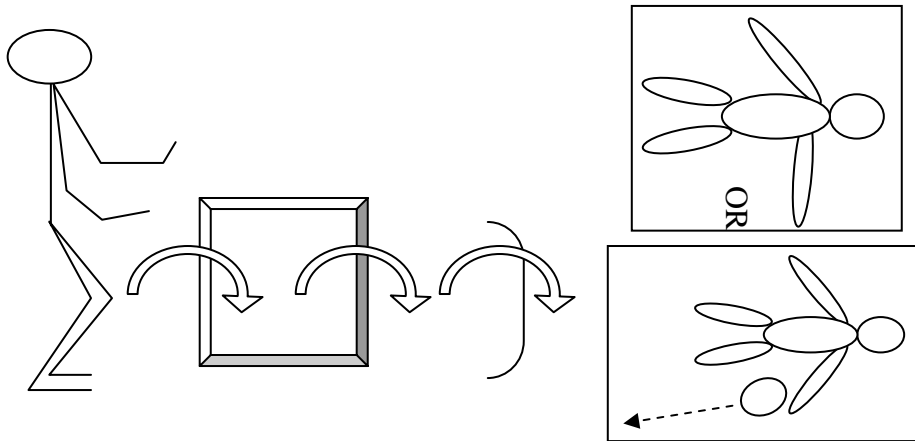

### **Key points**

- Bend knees to absorb landing
- Keep arms close to body
- Keep foot close to hips

## **Mini-Tramp Land (Catch, Step)**

Players are to jump/hop onto the min-tramp and land  
As they are landing a ball will be hand passed indicating direction to cut  
Instruction is provided regarding technique as usual

### **Equipment**

- Mini-tramp
- Footballs

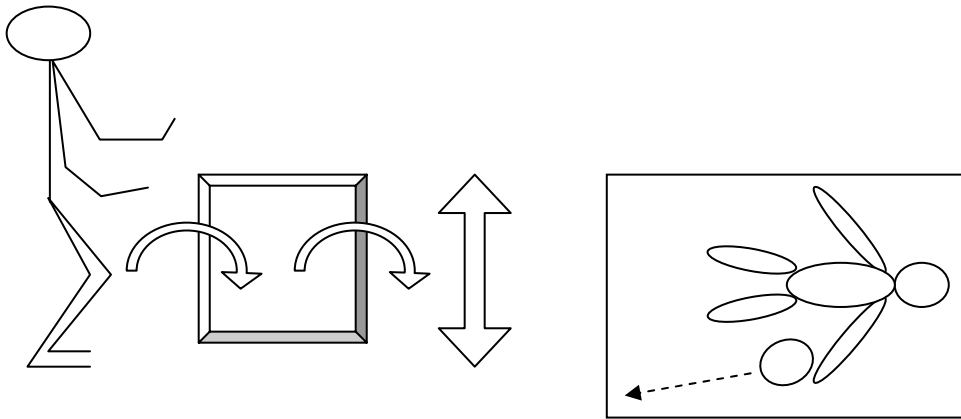

### **Key points**

- Bend knees to absorb landing
- Keep arms close to body
- Keep foot close to hips

# Training Exercises Rollout

|                           |                                              | Tim Doyle<br>Season 2007 |   |            |   |            |   |            |   |                |    |            |    |            |    |            |    |              |    |            |    |            |    |            |    |              |    |            |    |            |    |            |    |               |   |  |  |  |  |  |  |               |  |  |  |  |  |  |  |               |  |  |  |  |  |  |  |
|---------------------------|----------------------------------------------|--------------------------|---|------------|---|------------|---|------------|---|----------------|----|------------|----|------------|----|------------|----|--------------|----|------------|----|------------|----|------------|----|--------------|----|------------|----|------------|----|------------|----|---------------|---|--|--|--|--|--|--|---------------|--|--|--|--|--|--|--|---------------|--|--|--|--|--|--|--|
| Training Week             | Season Dates<br>(Based on 2006)              | 1                        | 2 | 3          | 4 | 5          | 6 | 7          | 8 | 9              | 10 | 11         | 12 | 13         | 14 | 15         | 16 | 17           | 18 | 19         | 20 | 21         | 22 | 23         | 24 | 25           | 26 | 27         | 28 | 29         | 30 | 31         | 32 |               |   |  |  |  |  |  |  |               |  |  |  |  |  |  |  |               |  |  |  |  |  |  |  |
| Focus                     |                                              | Gen. Prep.               |   |            |   |            |   |            |   | Basic/Aggress. |    |            |    |            |    |            |    | Aggressive 1 |    |            |    |            |    |            |    | Aggressive 2 |    |            |    |            |    |            |    | Maintenance 1 |   |  |  |  |  |  |  | Maintenance 2 |  |  |  |  |  |  |  | Maintenance 3 |  |  |  |  |  |  |  |
| Intensity                 |                                              |                          |   |            |   |            |   |            |   |                |    |            |    |            |    |            |    |              |    |            |    |            |    |            |    |              |    |            |    |            |    |            |    |               |   |  |  |  |  |  |  |               |  |  |  |  |  |  |  |               |  |  |  |  |  |  |  |
| Frequency                 |                                              | 2 per week               |   | 2 per week |   | 2 per week |   | 2 per week |   | 2 per week     |    | 2 per week |    | 2 per week |    | 2 per week |    | 2 per week   |    | 1 per week |    | 1 per week |    | 1 per week |    | 1 per week   |    | 1 per week |    | 1 per week |    | 1 per week |    |               |   |  |  |  |  |  |  |               |  |  |  |  |  |  |  |               |  |  |  |  |  |  |  |
| BALANCE                   | DURA-DISC BALANCE (DLS)                      | →                        | → | →          | → | →          | → | →          | → | →              | →  | →          | →  | →          | →  | →          | →  | →            | →  | →          | →  | →          | →  | →          | →  | →            | →  | →          | →  | →          | →  | →          | →  | →             |   |  |  |  |  |  |  |               |  |  |  |  |  |  |  |               |  |  |  |  |  |  |  |
|                           | DURA-DISC BALANCE (SLS)                      | →                        | → | →          | → | →          | → | →          | → | →              | →  | →          | →  | →          | →  | →          | →  | →            | →  | →          | →  | →          | →  | →          | →  | →            | →  | →          | →  | →          | →  | →          | →  | →             |   |  |  |  |  |  |  |               |  |  |  |  |  |  |  |               |  |  |  |  |  |  |  |
|                           | WOBBLE BOARD (SLS/DLS)                       | →                        | → | →          | → | →          | → | →          | → | →              | →  | →          | →  | →          | →  | →          | →  | →            | →  | →          | →  | →          | →  | →          | →  | →            | →  | →          | →  | →          | →  | →          | →  | →             |   |  |  |  |  |  |  |               |  |  |  |  |  |  |  |               |  |  |  |  |  |  |  |
|                           | SWISS BALL KNEELING (ON BASE)                | →                        | → | →          | → | →          | → | →          | → | →              | →  | →          | →  | →          | →  | →          | →  | →            | →  | →          | →  | →          | →  | →          | →  | →            | →  | →          | →  | →          | →  | →          | →  | →             |   |  |  |  |  |  |  |               |  |  |  |  |  |  |  |               |  |  |  |  |  |  |  |
|                           | SWISS BALL KNEELING (NO BASE WWO PART.)      | →                        | → | →          | → | →          | → | →          | → | →              | →  | →          | →  | →          | →  | →          | →  | →            | →  | →          | →  | →          | →  | →          | →  | →            | →  | →          | →  | →          | →  | →          | →  | →             |   |  |  |  |  |  |  |               |  |  |  |  |  |  |  |               |  |  |  |  |  |  |  |
|                           | SWISS BALL SQUAT                             | →                        | → | →          | → | →          | → | →          | → | →              | →  | →          | →  | →          | →  | →          | →  | →            | →  | →          | →  | →          | →  | →          | →  | →            | →  | →          | →  | →          | →  | →          | →  | →             |   |  |  |  |  |  |  |               |  |  |  |  |  |  |  |               |  |  |  |  |  |  |  |
| BALANCE w/- TASK          | BALANCE HANDPASSING (WWO TOUCH GROUND)       | →                        | → | →          | → | →          | → | →          | → | →              | →  | →          | →  | →          | →  | →          | →  | →            | →  | →          | →  | →          | →  | →          | →  | →            | →  | →          | →  | →          | →  | →          | →  | →             |   |  |  |  |  |  |  |               |  |  |  |  |  |  |  |               |  |  |  |  |  |  |  |
|                           | BALANCE KICKING DURA-DISC                    | →                        | → | →          | → | →          | → | →          | → | →              | →  | →          | →  | →          | →  | →          | →  | →            | →  | →          | →  | →          | →  | →          | →  | →            | →  | →          | →  | →          | →  | →          | →  | →             |   |  |  |  |  |  |  |               |  |  |  |  |  |  |  |               |  |  |  |  |  |  |  |
|                           | BALANCE HAND PASSING DURA-DISC               | →                        | → | →          | → | →          | → | →          | → | →              | →  | →          | →  | →          | →  | →          | →  | →            | →  | →          | →  | →          | →  | →          | →  | →            | →  | →          | →  | →          | →  | →          | →  | →             |   |  |  |  |  |  |  |               |  |  |  |  |  |  |  |               |  |  |  |  |  |  |  |
|                           | HOP - DURA-DISC BALANCE                      | →                        | → | →          | → | →          | → | →          | → | →              | →  | →          | →  | →          | →  | →          | →  | →            | →  | →          | →  | →          | →  | →          | →  | →            | →  | →          | →  | →          | →  | →          | →  | →             |   |  |  |  |  |  |  |               |  |  |  |  |  |  |  |               |  |  |  |  |  |  |  |
|                           | BALANCE HANDPASSING (WOBBLE)                 | →                        | → | →          | → | →          | → | →          | → | →              | →  | →          | →  | →          | →  | →          | →  | →            | →  | →          | →  | →          | →  | →          | →  | →            | →  | →          | →  | →          | →  | →          | →  | →             |   |  |  |  |  |  |  |               |  |  |  |  |  |  |  |               |  |  |  |  |  |  |  |
| BASIC MIMENT TASK         | 10 METRE SQUARES (MULTIDIRECTN RUN)          | →                        | → | →          | → | →          | → | →          | → | →              | →  | →          | →  | →          | →  | →          | →  | →            | →  | →          | →  | →          | →  | →          | →  | →            | →  | →          | →  | →          | →  | →          | →  | →             |   |  |  |  |  |  |  |               |  |  |  |  |  |  |  |               |  |  |  |  |  |  |  |
|                           | WEAVING BOUNDS                               | →                        | → | →          | → | →          | → | →          | → | →              | →  | →          | →  | →          | →  | →          | →  | →            | →  | →          | →  | →          | →  | →          | →  | →            | →  | →          | →  | →          | →  | →          | →  | →             |   |  |  |  |  |  |  |               |  |  |  |  |  |  |  |               |  |  |  |  |  |  |  |
|                           | WEAVING HOPS                                 | →                        | → | →          | → | →          | → | →          | → | →              | →  | →          | →  | →          | →  | →          | →  | →            | →  | →          | →  | →          | →  | →          | →  | →            | →  | →          | →  | →          | →  | →          | →  | →             | → |  |  |  |  |  |  |               |  |  |  |  |  |  |  |               |  |  |  |  |  |  |  |
|                           | PRE-PLANNED                                  | →                        | → | →          | → | →          | → | →          | → | →              | →  | →          | →  | →          | →  | →          | →  | →            | →  | →          | →  | →          | →  | →          | →  | →            | →  | →          | →  | →          | →  | →          | →  | →             | → |  |  |  |  |  |  |               |  |  |  |  |  |  |  |               |  |  |  |  |  |  |  |
| COD TASKS (SIDE STEPPING) | UN-PLANNED POINTING                          | →                        | → | →          | → | →          | → | →          | → | →              | →  | →          | →  | →          | →  | →          | →  | →            | →  | →          | →  | →          | →  | →          | →  | →            | →  | →          | →  | →          | →  | →          | →  | →             |   |  |  |  |  |  |  |               |  |  |  |  |  |  |  |               |  |  |  |  |  |  |  |
|                           | UN-PLANNED PLAYER                            | →                        | → | →          | → | →          | → | →          | → | →              | →  | →          | →  | →          | →  | →          | →  | →            | →  | →          | →  | →          | →  | →          | →  | →            | →  | →          | →  | →          | →  | →          | →  | →             | → |  |  |  |  |  |  |               |  |  |  |  |  |  |  |               |  |  |  |  |  |  |  |
|                           | UN-PLANNED BALL                              | →                        | → | →          | → | →          | → | →          | → | →              | →  | →          | →  | →          | →  | →          | →  | →            | →  | →          | →  | →          | →  | →          | →  | →            | →  | →          | →  | →          | →  | →          | →  | →             | → |  |  |  |  |  |  |               |  |  |  |  |  |  |  |               |  |  |  |  |  |  |  |
| LANDING TASKS             | HURDLE JUMPS                                 | →                        | → | →          | → | →          | → | →          | → | →              | →  | →          | →  | →          | →  | →          | →  | →            | →  | →          | →  | →          | →  | →          | →  | →            | →  | →          | →  | →          | →  | →          | →  | →             | → |  |  |  |  |  |  |               |  |  |  |  |  |  |  |               |  |  |  |  |  |  |  |
|                           | LATERAL HURDLE JUMPS                         | →                        | → | →          | → | →          | → | →          | → | →              | →  | →          | →  | →          | →  | →          | →  | →            | →  | →          | →  | →          | →  | →          | →  | →            | →  | →          | →  | →          | →  | →          | →  | →             | → |  |  |  |  |  |  |               |  |  |  |  |  |  |  |               |  |  |  |  |  |  |  |
|                           | MINI-TRAMP LAND                              | →                        | → | →          | → | →          | → | →          | → | →              | →  | →          | →  | →          | →  | →          | →  | →            | →  | →          | →  | →          | →  | →          | →  | →            | →  | →          | →  | →          | →  | →          | →  | →             | → |  |  |  |  |  |  |               |  |  |  |  |  |  |  |               |  |  |  |  |  |  |  |
|                           | HOP                                          | →                        | → | →          | → | →          | → | →          | → | →              | →  | →          | →  | →          | →  | →          | →  | →            | →  | →          | →  | →          | →  | →          | →  | →            | →  | →          | →  | →          | →  | →          | →  | →             | → |  |  |  |  |  |  |               |  |  |  |  |  |  |  |               |  |  |  |  |  |  |  |
|                           | JUMPS (UP/PP)                                | →                        | → | →          | → | →          | → | →          | → | →              | →  | →          | →  | →          | →  | →          | →  | →            | →  | →          | →  | →          | →  | →          | →  | →            | →  | →          | →  | →          | →  | →          | →  | →             | → |  |  |  |  |  |  |               |  |  |  |  |  |  |  |               |  |  |  |  |  |  |  |
|                           | MINI-TRAMP LANDING SUDL PP HOP/JUMP (HURDLE) | →                        | → | →          | → | →          | → | →          | → | →              | →  | →          | →  | →          | →  | →          | →  | →            | →  | →          | →  | →          | →  | →          | →  | →            | →  | →          | →  | →          | →  | →          | →  | →             | → |  |  |  |  |  |  |               |  |  |  |  |  |  |  |               |  |  |  |  |  |  |  |
|                           | MINI-TRAMP LAND (HOP, STEP)                  | →                        | → | →          | → | →          | → | →          | → | →              | →  | →          | →  | →          | →  | →          | →  | →            | →  | →          | →  | →          | →  | →          | →  | →            | →  | →          | →  | →          | →  | →          | →  | →             | → |  |  |  |  |  |  |               |  |  |  |  |  |  |  |               |  |  |  |  |  |  |  |
|                           | MINI-TRAMP LAND (CATCH, STEP)                | →                        | → | →          | → | →          | → | →          | → | →              | →  | →          | →  | →          | →  | →          | →  | →            | →  | →          | →  | →          | →  | →          | →  | →            | →  | →          | →  | →          | →  | →          | →  | →             | → |  |  |  |  |  |  |               |  |  |  |  |  |  |  |               |  |  |  |  |  |  |  |
|                           | MINI-TRAMP LAND (LATERAL HOP)                | →                        | → | →          | → | →          | → | →          | → | →              | →  | →          | →  | →          | →  | →          | →  | →            | →  | →          | →  | →          | →  | →          | →  | →            | →  | →          | →  | →          | →  | →          | →  | →             | → |  |  |  |  |  |  |               |  |  |  |  |  |  |  |               |  |  |  |  |  |  |  |
| STEPPING TASKS            |                                              | →                        | → | →          | → | →          | → | →          | → | →              | →  | →          | →  | →          | →  | →          | →  | →            | →  | →          | →  | →          | →  | →          | →  | →            | →  | →          | →  | →          | →  | →          | →  | →             | → |  |  |  |  |  |  |               |  |  |  |  |  |  |  |               |  |  |  |  |  |  |  |
